# Supplementary material for: Discarded cigarette filter-derived hierarchically porous carbon@graphene composites for lithium–sulfur batteries
Source: Royal Society of Chemistry journal article supplement (doi:10.1039/c8ta11615f), 2019-01-01
Supplement: c8ta11615f1.pdf [file c8ta11615f1.pdf]

## Supporting Information

### **Discarded cigarette filters-derived hierarchically porous carbon@graphene composites for lithium-sulfur batteries**

Hongbin Xu,<sup>a</sup> Yang Liu,<sup>b</sup> Qianyun Bai,<sup>a</sup> Renbing Wu<sup>a,c,d\*</sup>

## **Experimental Section**

### *Preparation of Graphene Oxide (GO).*

GO was prepared based on the modified Hummers' method.

### *Preparation of PC@G, PC and G.*

Waste cigarette filters (CFs) were collected with wrapped papers removed in advance. The CFs were rinsed by deionized water and then were immersed in the GO suspension ( $7 \text{ mg mL}^{-1}$ ) for 6 h. After that, CFs@GO composites were placed in the refrigerator at  $-4 \text{ }^\circ\text{C}$  overnight and dried in a freeze dryer with a vacuum at  $-50 \text{ }^\circ\text{C}$  for 24 h. Finally, the composites were heated to  $900 \text{ }^\circ\text{C}$  with the rate of  $5 \text{ }^\circ\text{C min}^{-1}$  to get PC@G. For comparison, we also synthesized PC and G by similar methods but using bare CFs and GO, respectively.

### *Preparation of PC@G/S, PC/S, G/S.*

The PC@G/S composite was prepared via a melt-diffusion method. Typically, a mixture of sublimed sulfur and PC@G with a mass ratio of 4:1 was sealed in a glass bottle, and heated at  $155 \text{ }^\circ\text{C}$  for 12 h in an oven. PC/S and G/S were prepared in a similar way.

### *Materials characterization*

The phase of the as-prepared composites was identified using a powder X-ray diffraction (XRD, D8 ADVANCE X-ray diffractometer) system with Cu  $K\alpha$  radiation. The field emission scanning electron microscope (FESEM, ZEIS, Ultra-55) and transmission electron microscope (TEM, JEOL JEM-2100F) were used to investigate morphologies and microstructures of the composites. Noted that the FESEM systems were equipped with energy-dispersive X-ray (EDX) spectroscopy. The chemical states of the elements in composites were revealed by X-ray photoelectron spectroscopy (XPS, XSAM-800 spectrometer with an Mg  $K\alpha$  radiation source). Raman spectra were recorded on an Invia/Reflrx Laser Micro-Raman spectroscope. The specific surface area and the pore-size distribution of the as-prepared composites was determined by nitrogen sorption isotherm at 77 K (ASAP 2020 Plus HD88 instrument). Thermogravimetric analysis (TGA) measurements were carried out on a Netzsch STA 449C

thermal analyzer from room temperature to 500 °C at a heating rate of 10 °C min<sup>-1</sup> in a N<sub>2</sub> atmosphere.

#### *Electrochemical measurements*

The electrochemical performance was evaluated using CR2032 coin-type cells. The cathode was fabricated by mixing the as-prepared PC@G/S, carbon nanotubes (CNTs) and polyvinylidene fluoride (PVDF) in a weight ratio of 8:1:1 in N-methyl-2-pyrrolidinone solvent. The resulting slurry was then coated onto aluminium foil followed by drying under vacuum at 50 °C for 12 h. The loading density of sulfur was ~ 2.0 mg cm<sup>-2</sup>. The anode was Li metal and the separator was Celgard-2300. The electrolyte was 1.0 M bis(trifluoromethane)sulfonimide lithium salt (LiTFSI) in a 1:1 (v/v) mixture of 1,2-dimethoxyethane (DME) and 1,3-dioxolane (DOL) containing 1.0 wt% LiNO<sub>3</sub>. The amount ratio of electrolyte/sulfur was 20 μL:1 mg and therefore the volume of the electrolyte used in each cell was ranging from 30 to 50 μL. The galvanostatic charge and discharge tests were carried out on a LAND CT2001 testing system at the voltage window of 1.7–2.8 V. Cyclic voltammetry (CV) was determined on a CHI 760E electrochemical workstation (Shanghai, China) in the voltage range of 1.7–2.8 V at a scan rate of 0.1 mV s<sup>-1</sup>. Electrochemical impedance spectroscopy (EIS) measurements were carried out on an electrochemical workstation (AutoLab PGSTAT302N) in the frequency range from 100 kHz to 0.01Hz. 0.2 M Li<sub>2</sub>S<sub>6</sub> was dissolved in DME/DOL (v/v, 1:1) and diluted to 0.002 M for the adsorption test. All the adsorbents (10 mg) were dried in vacuum oven before adding into the Li<sub>2</sub>S<sub>6</sub> solution. The sealed vials were kept in glove box overnight, and then the liquid supernatants were used for the UV–visible absorption spectrophotometry (UV–vis, Varian Cary 100 Conc).

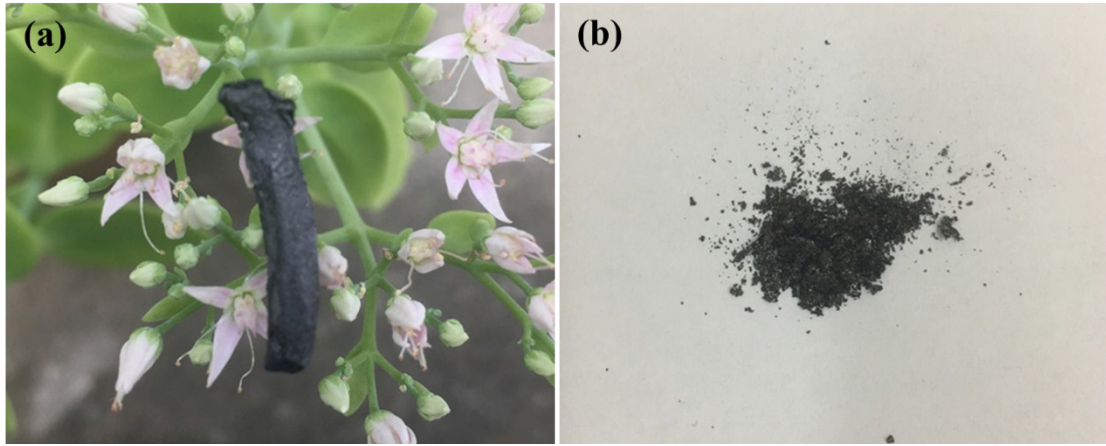

**Fig. S1** Photograph of (a) cigarette filters-derived PC@G and (b) cigarette filters-derived PC composites.

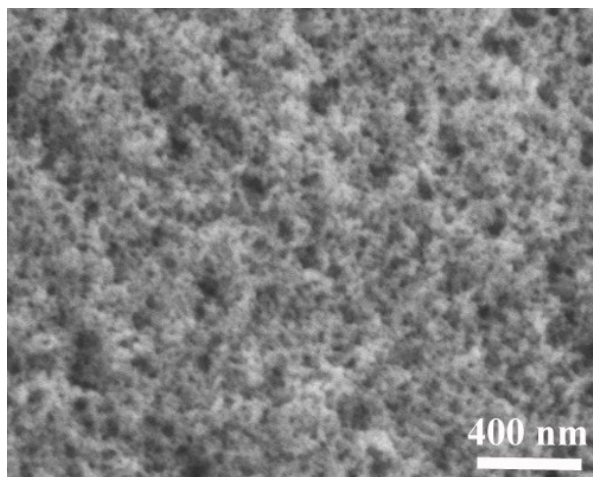

**Fig. S2** Cross-section FESEM image of PC@G composite.

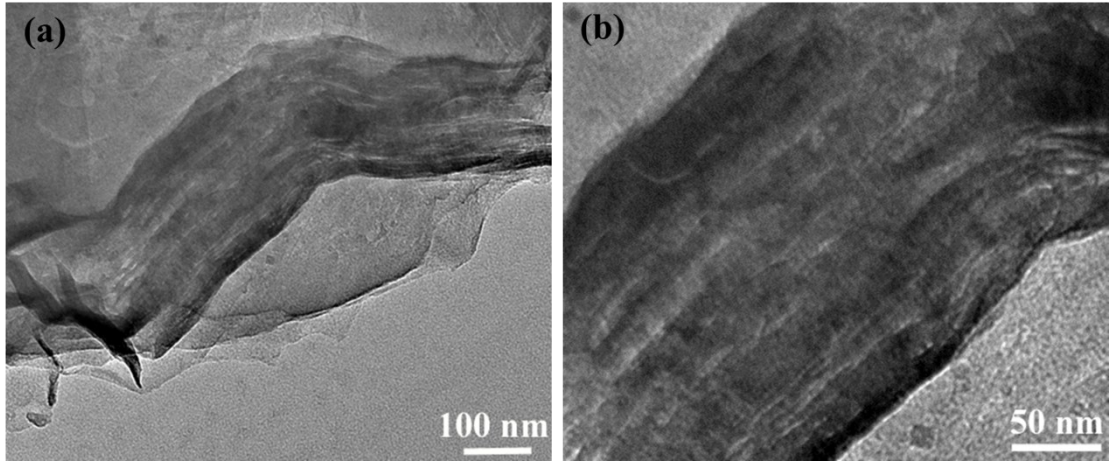

**Fig. S3** (a) and (b) TEM images of PC@G composite.

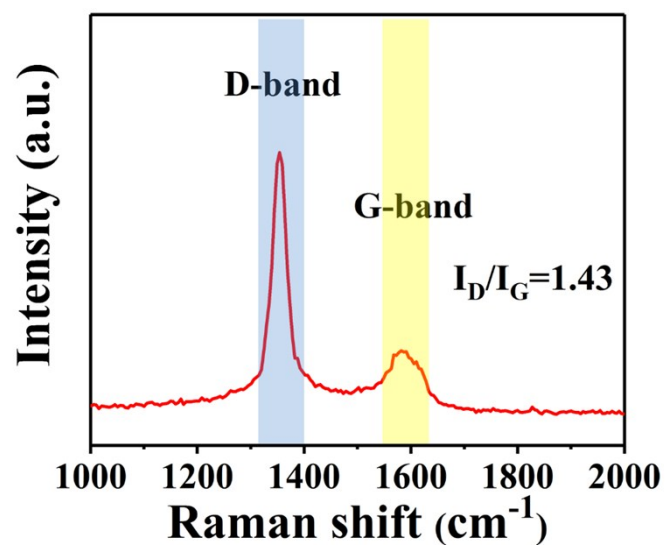

Fig. S4 Raman spectrum of cigarette filters-derived PC.

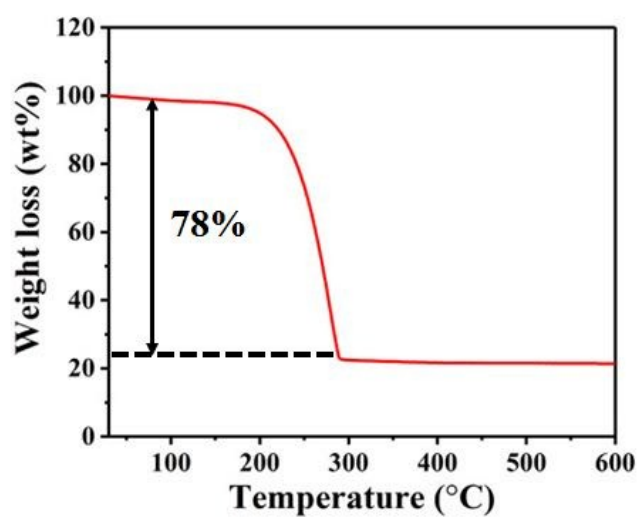

Fig. S5 TGA curve of PC@G/S composites.

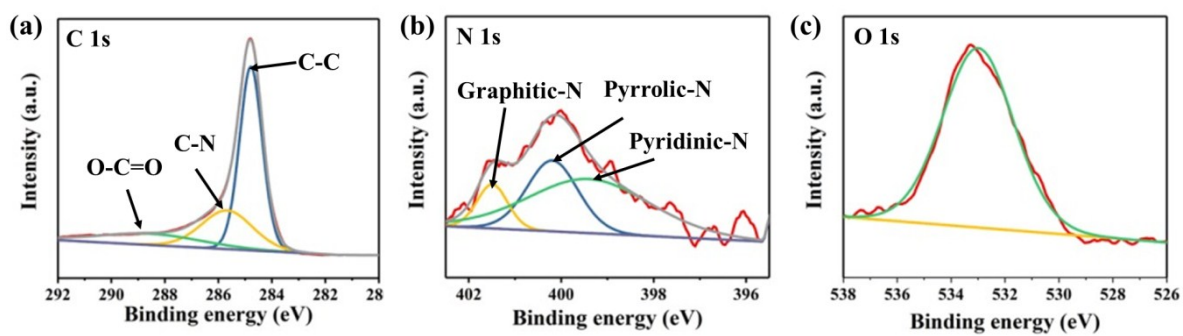

**Fig. S6** XPS spectra of PC@G: (a) C 1s, (b) N 1s and (c) O 1s.



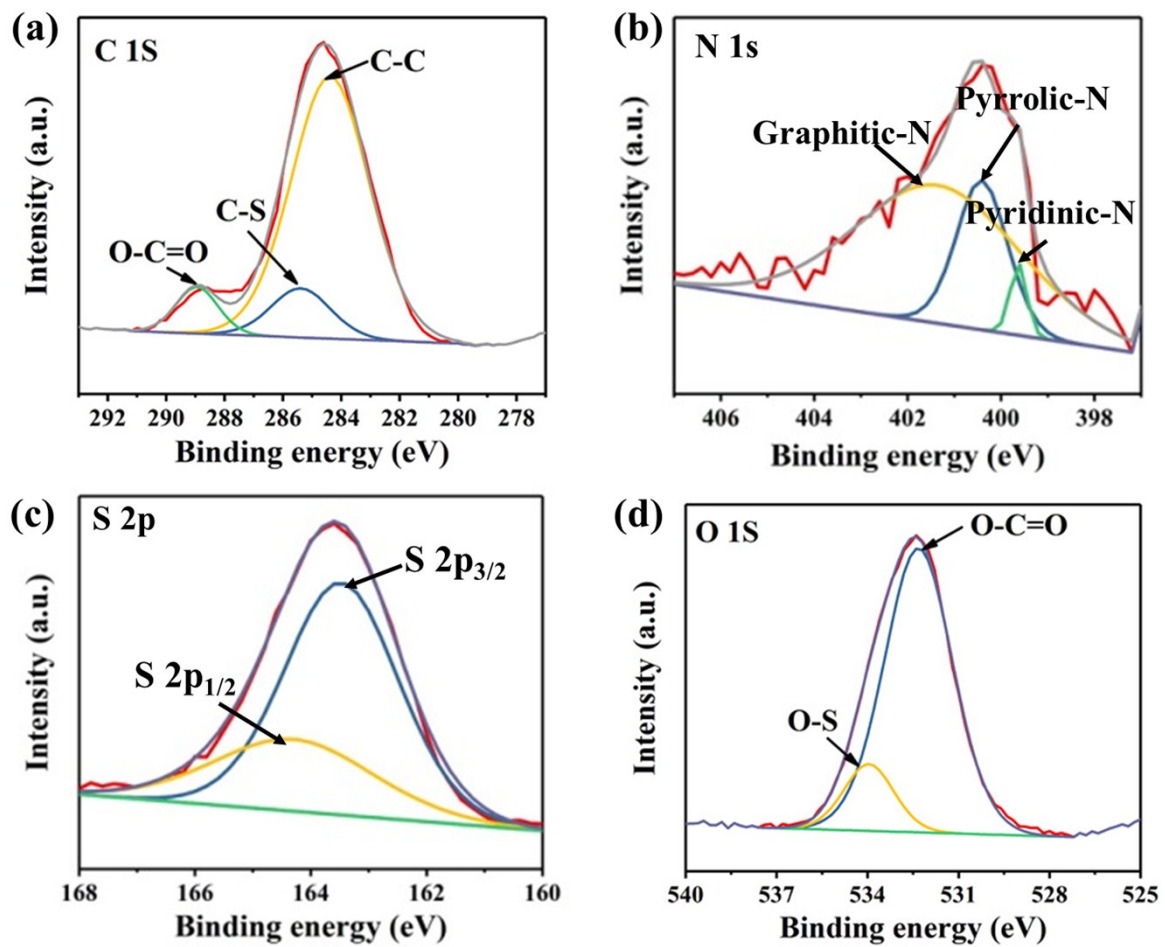

Fig. S7 XPS spectra of PC@G/S: (a) C 1s, (b) N 1s, (c) S 2p and (d) O 1s.

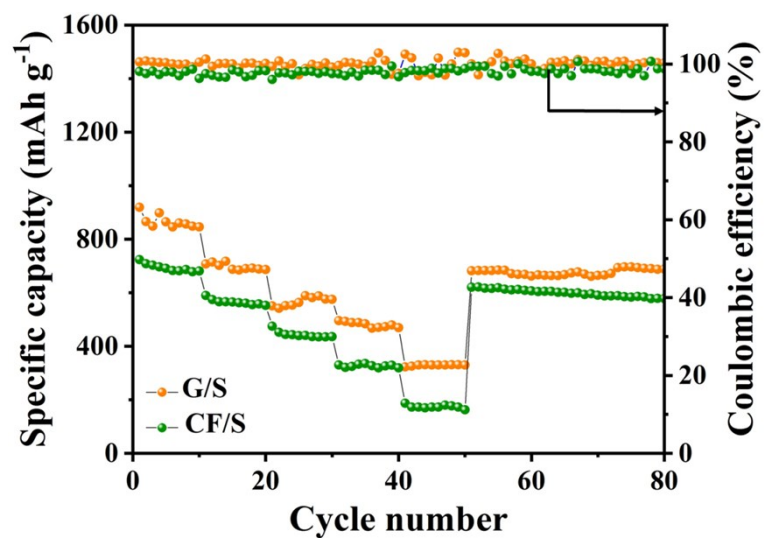

**Fig. S8** Rate capabilities and corresponding coulombic efficiencies of G@S and PC@S cathodes at various current densities from 0.1 to 2.0 C.

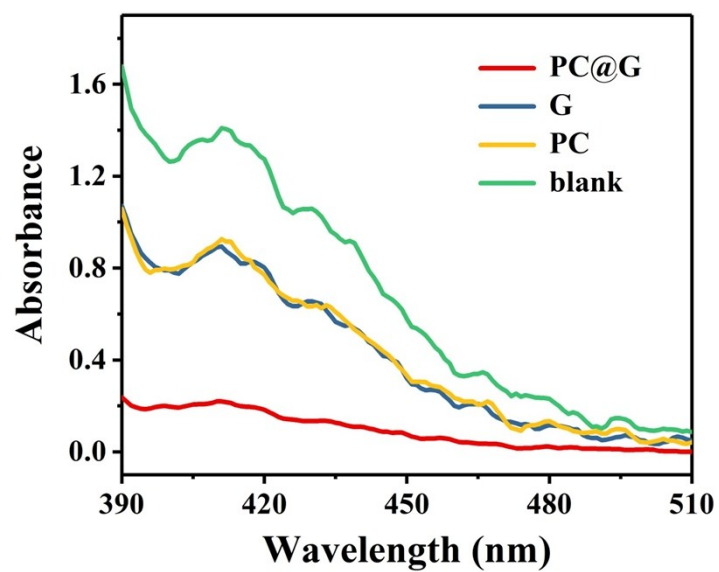

**Fig. S9** UV-vis adsorption spectra of polysulfide solutions absorbed by PC@G, G, and PC.

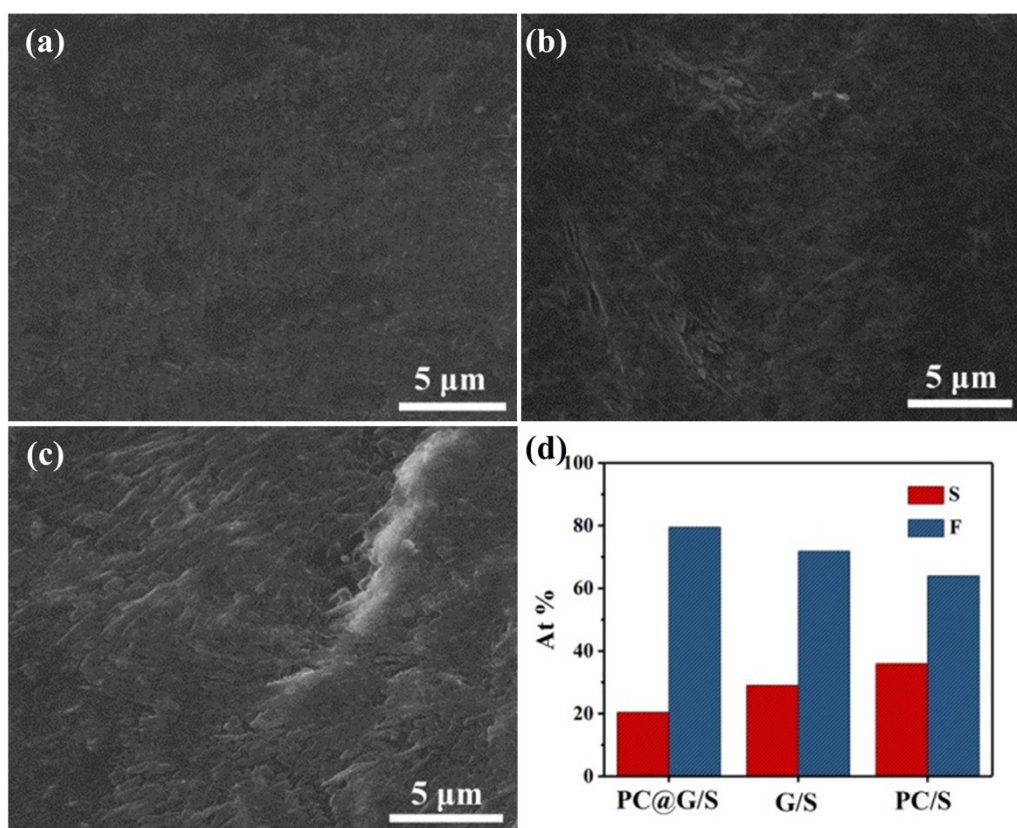

**Fig. S10** FESEM images of Li anodes of Li-S batteries using (a) PC@G/S, (b) G/S and (c) PC/S cathodes after 100 cycles. (d) EDS results of elemental S and F recorded from different Li anodes after 100 cycles.

**Table S1.** Comparison of electrochemical performances of PC@G@S composites cathode with previously reported carbon-based cathodes.

| Material                         | Electrode Formulation <sup>a</sup> | Cycling stability (A/B/n) <sup>b</sup> | Ref.     |
|----------------------------------|------------------------------------|----------------------------------------|----------|
| GN-CNT@S                         | 7:2:1                              | 463.7/0.5/500                          | [S1]     |
| <del>nanotubes</del><br>PRC@Ni@S | 8:1:1                              | 821/0.2/500                            | [S2]     |
| PGPC@Ni@S                        | 8:1:1                              | 1030/0.2/200                           | [S3]     |
| NCNT@G@S                         | 8:1:1                              | 896/0.5/200                            | [S4]     |
| M-MGCSs@S                        | 8:1:1                              | 908/0.2/100                            | [S5]     |
| NMCNFs@S                         | 8:1:1                              | 636/0.1/500                            | [S6]     |
| rGO@PC@S                         | 8:1:1                              | 848/1.0/300                            | [S7]     |
| POF-HS@S                         | 8:1:1                              | 773/0.5/200                            | [S8]     |
| GC-PC@Co@S                       | 8:1:1                              | 790/0.2/220                            | [S8]     |
| N-PCNSs@Co@S                     | 8:1:1                              | 913/0.2/100                            | [S9]     |
| PCS@S                            | 8:1:1                              | 1013/0.2/50                            | [S10]    |
| PCNF@CNT@S                       | 8:1:1                              | 798.5/0.5/200                          | [S11]    |
| GLC@S                            | 8:1:1                              | 504/1.0/400                            | [S12]    |
| N-SWCNH@S                        | 8:1:1                              | 573/0.1/200                            | [S13]    |
| PC-CNT@S                         | 8:1:1                              | 932.8/0.5/150                          | [S14]    |
| PC@G@S                           | 8:1:1                              | 1010.4/0.2/200                         | Our work |
| PC@G@S                           | 8:1:1                              | 721.9/0.5/1000                         | Our work |
| PC@G@S                           | 8:1:1                              | 508.4/1.0/1000                         | Our work |

<sup>a</sup>Weight ratio of the active material, carbon and binder.

<sup>b</sup>A/B/n means the capacity of A (mAh g<sup>-1</sup>) remained after *n* cycles at the certain current density of B (C).

## References

- 1 Z. Zhang, L. L. Kong, S. Liu, G. R. Li, X. P. Gao, *Adv. Energy Mater.* 2017, **7**, 1602543.
- 2 Y. Zhong, X. H. Xia, S. J. Deng, J. Y. Zhan, R. Y. Fang, Y. Xia, X. L. Wang, Q. Zhang, J. P. Tu, *Adv. Energy Mater.* 2018, **8**, 1701110.
- 3 X. Q. Zhang, Y. Zhong, X. H. Xia, Y. Xia, D. H. Wang, C. A. Zhou, W. J. Tang, X. L. Wang, J. B. Wu, J. P. Tu, *ACS Appl. Mater. Interfaces* 2018, **10**, 13598–13605.
- 4 Y. Ding, P. Kopold, K. Hahn, P. A. van Aken, J. Maier, Y. Yu, *Adv. Funct. Mater.* 2016, **26**, 1112-1119.
- 5 J. H. Zheng, G. N. Guo, H. W. Li, L. Wang, B. W. Wang, H. J. Yu, Y. C. Yan, D. Yang, A. G. Dong, *ACS Energy Lett.* 2017, **2**, 1105-1114.
- 6 Y. C. Yao, P. Liu, Q. Zhang, S. Z. Zeng, S. S. Chen, G. J. Zou, J. Z. Zou, X. R. Zeng, X. H. Li, *Mater. Lett.* 2018, **231**, 159-162.
- 7 H. Zhang, Q. M. Gao, W. W. Qian, H. Xiao, Z. Y. Li, L. Ma, X. H. Tian, *ACS Appl. Mater. Interfaces*, 2018, **10**, 18726–18733.
- 8 B.-Q. Li, S.-Y. Zhang, L. Kong, H.-J. Peng, Q. *Adv. Mater.* 2018, **30**, 1707483.
- 9 Y. Q. Lu, Y. J. Wu, T. Sheng, X. X. Peng, Z. G. Gao, S. J. Zhang, L. Deng, R. Nie, J. Swiatowska, J. T. Li, Y. Zhou, L. Huang, X. D. Zhou, S. G. Sun, *ACS Appl. Mater. Interfaces*, 2018, **10 (16)**, 13499–13508.
- 10 S. H. Liu, J. Li, X. Yan, Q. F. Su, Y. H. Lu, J. S. Qiu, Z. Y. Wang, X. D. Lin, J. L. Huang, R. L. Liu, B. N. Zheng, L. Y. Chen, R. W. Fu, D. C. Wu, *Adv. Mater.* 2018, **30**, 1706895.
- 11 G. Li, W. Lei, D. Luo, Y.-P. Deng, D. Wang, Z. Chen, *Adv. Energy Mater.* 2018, **8**, 1702381.
- 12 Y. Z. Zhang, Z. Zhang, S. Liu, G. R. Li, X. P. Gao, *ACS Appl. Mater. Interfaces*, 2018, **10**,

8749–8757.

- 13 H. W. Du, X. C. Gui, R. L. Yang, Z. Q. Lin, B. H. Liang, W. J. Chen, Y. J. Zheng, H. Zhu, J. Chen, *Nanoscale*, 2018, **10**, 3877-3883
- 14 U. Gulzar, T. Li, X. Bai, M. Colombo, A. Ansaldo, S. Marras, M. Prato, S. Goriparti, C. Capiglia, R. P. Zaccaria, *ACS Appl. Mater. Interfaces*, 2018, **10**, 5551–5559.
- 15 W. Yang, W. Yang, A. L. Song, G. Sun, G. J. Shao, *Nanoscale*, 2018, **10**, 816-824.
